# Supplementary figures and images for: Adipose-derived Stem Cells Stimulated with n-Butylidenephthalide Exhibit Therapeutic Effects in a Mouse Model of Parkinson’s Disease
Source: PubMed Central journal article supplement — Cell Transplant. 2018 May 14;27(3):456–70. doi: 10.1177/0963689718757408 (PMC6038049; doi:10.1177/0963689718757408), 2018-05-14

**C**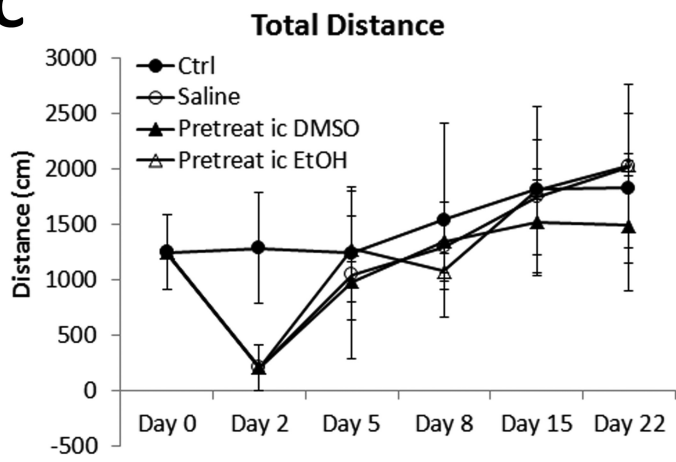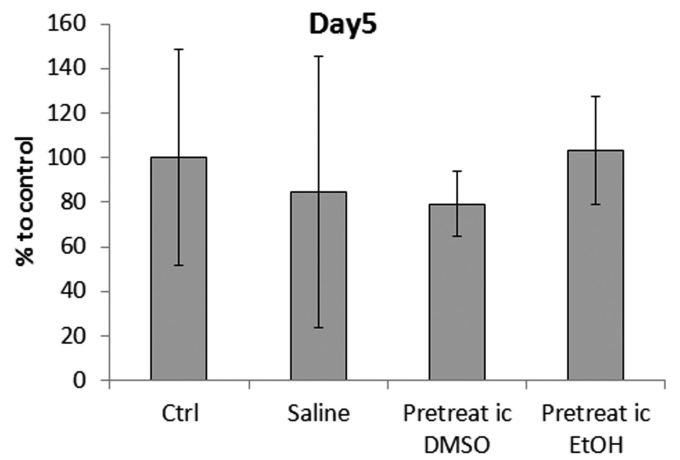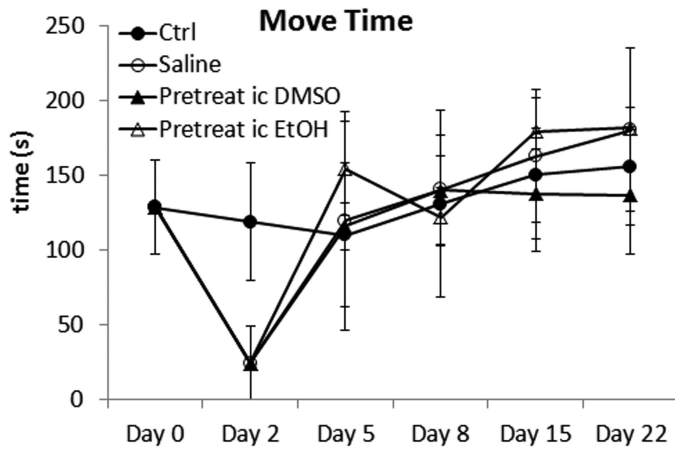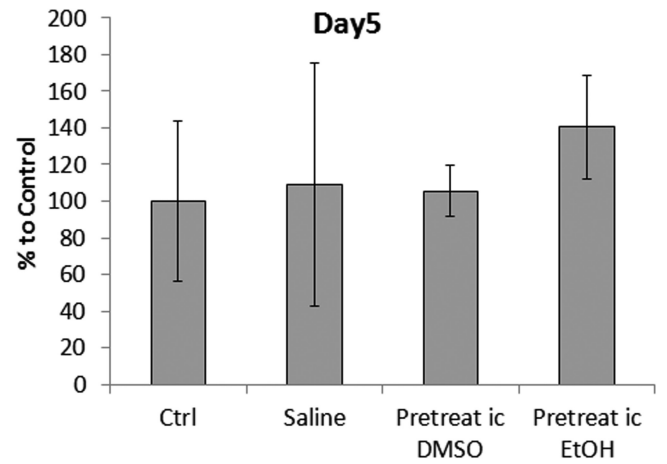**D**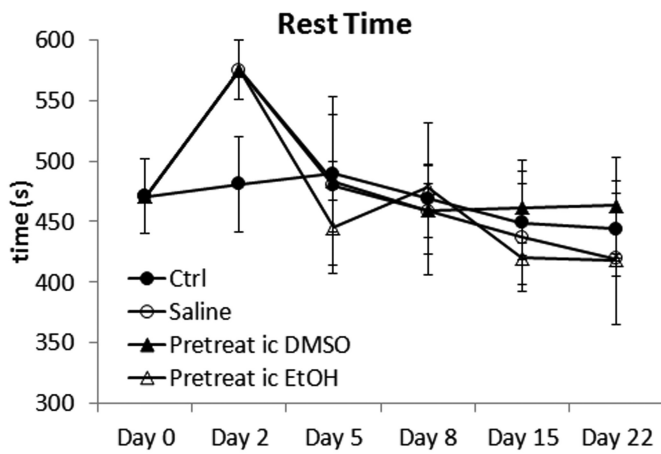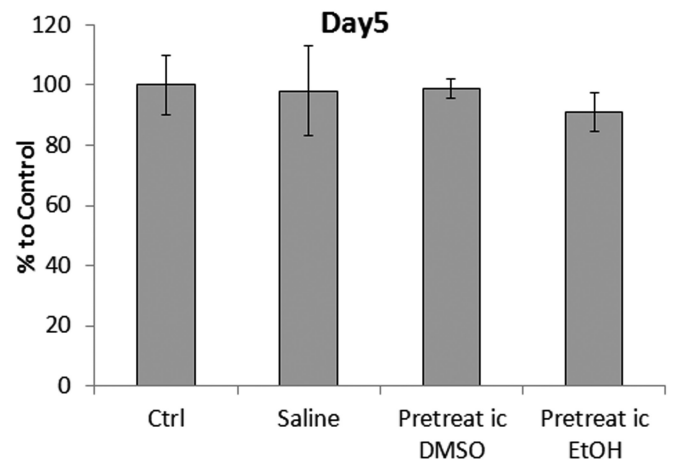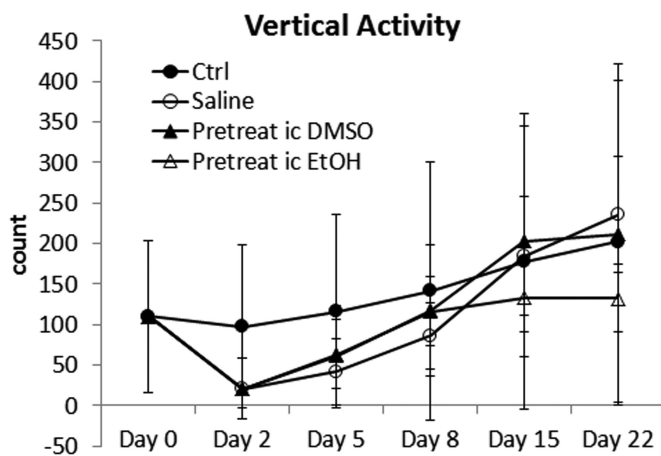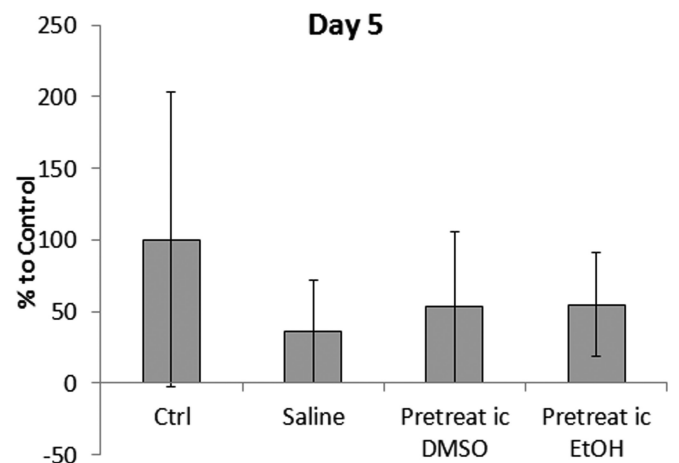

Supplement: S_Figure3CDnew.pdf [file S_Figure3CDnew.pdf]

**E**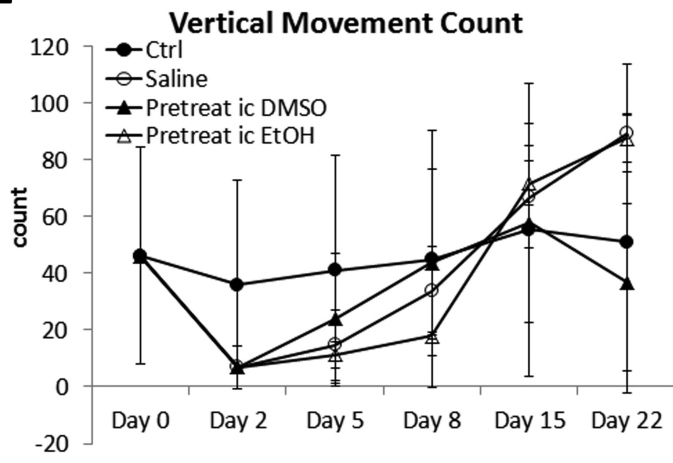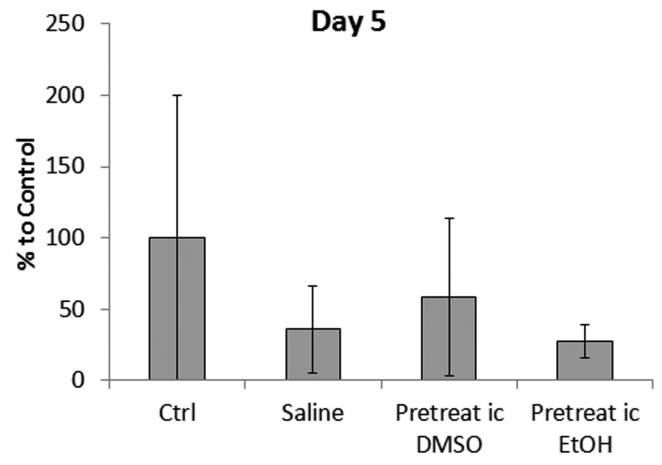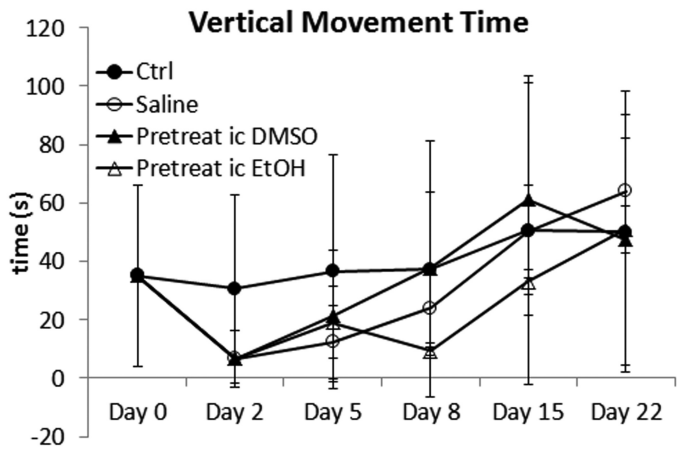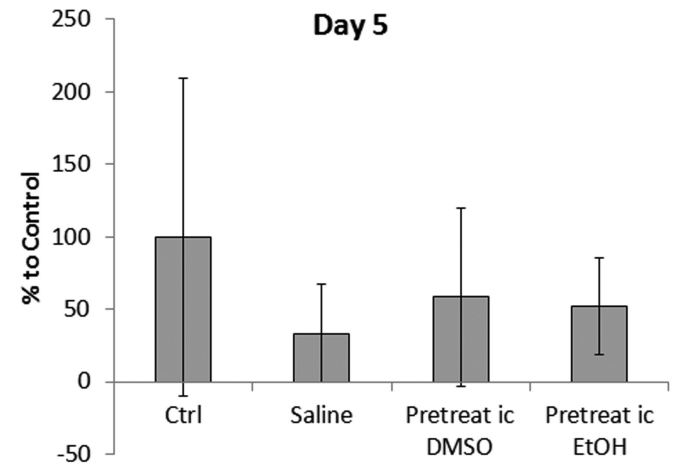

Supplement: S_Figure3Enew.pdf [file S_Figure3Enew.pdf]
